# Supplementary material
Source: Elsevier journal article supplement (https://cris.unibo.it/bitstream/11585/900061/5/mmc1.docx)
Supplement: mmc1 [file mmc1.docx]

**Supplementary material**

**Entomological authentication of honey based on a DNA method that distinguishes *Apis mellifera* mitochondrial C mitotypes: application to honey produced by *A. m. ligustica* and *A. m. carnica***

Valerio Joe Utzeri, Anisa Ribani, Valeria Taurisano, Luca Fontanesi

**Table S1.** Information on the honey samples analysed in this study.

| Laboratory ID | Country/Region | Type | Entomological origin (*Apis mellifera* subspecies) | Year of production |
| --- | --- | --- | --- | --- |
| 1 | Italy/Emilia-Romagna | Commercial | Unknown | 2019 |
| 2 | Italy/Emilia-Romagna | Commercial | Unknown | 2019 |
| 3 | Italy/Emilia-Romagna | Commercial | Unknown | 2019 |
| 4 | Italy/Emilia-Romagna | Commercial | Unknown | 2019 |
| 5 | Italy/Emilia-Romagna | Commercial | Unknown | 2019 |
| 6 | Italy/Emilia-Romagna | Commercial | Unknown | 2019 |
| 7 | Italy/Emilia-Romagna | Commercial | Unknown | 2019 |
| 8 | Italy/Emilia-Romagna | Commercial | Unknown | 2019 |
| 9 | Italy/Emilia-Romagna | Commercial | Unknown | 2019 |
| 10 | Italy/Emilia-Romagna | Commercial | Unknown | 2019 |
| 11 | Italy/Emilia-Romagna | Commercial | Unknown | 2019 |
| 12 | Italy/Emilia-Romagna | Commercial | Unknown | 2019 |
| 13 | Italy/Emilia-Romagna | Commercial | Unknown | 2019 |
| 14 | Italy/Emilia-Romagna | Commercial | Unknown | 2019 |
| 15 | Italy/Emilia-Romagna | Commercial | Unknown | 2019 |
| 16 | Italy/Emilia-Romagna | Commercial | Unknown | 2019 |
| 17 | Italy/Emilia-Romagna | Commercial | Unknown | 2019 |
| 18 | Italy/Emilia-Romagna | Commercial | Unknown | 2019 |
| 19 | Italy/Emilia-Romagna | Commercial | Unknown | 2019 |
| 20 | Italy/Emilia-Romagna | Commercial | Unknown | 2019 |
| 21 | Italy/Emilia-Romagna | Commercial | Unknown | 2019 |
| 22 | Italy/Emilia-Romagna | Commercial | Unknown | 2019 |
| 23 | Italy/Emilia-Romagna | Commercial | Unknown | 2019 |
| 24 | Italy/Emilia-Romagna | Commercial | Unknown | 2019 |
| 25 | Italy/Emilia-Romagna | Commercial | Unknown | 2019 |
| 26 | Italy/Emilia-Romagna | Commercial | Unknown | 2019 |
| 27 | Italy/Emilia-Romagna | Commercial | Unknown | 2019 |
| 28 | Italy/Emilia-Romagna | Commercial | Unknown | 2019 |
| 29 | Italy/Emilia-Romagna | Commercial | Unknown | 2019 |
| 30 | Italy/Emilia-Romagna | Commercial | Unknown | 2019 |
| 31 | Italy/Emilia-Romagna | Commercial | Unknown | 2019 |
| 32 | Italy/Emilia-Romagna | Commercial | Unknown | 2019 |
| 33 | Italy/Emilia-Romagna | Commercial | Unknown | 2019 |
| 34 | Italy/Emilia-Romagna | Commercial | Unknown | 2019 |
| 35 | Italy/Emilia-Romagna | Commercial | Unknown | 2019 |
| 36 | Italy/Emilia-Romagna | Commercial | Unknown | 2019 |
| 37 | Italy/Emilia-Romagna | Commercial | Unknown | 2019 |
| 38 | Italy/Emilia-Romagna | Commercial | Unknown | 2019 |
| 39 | Italy/Emilia-Romagna | Commercial | Unknown | 2019 |
| 40 | Italy/Emilia-Romagna | Commercial | Unknown | 2019 |
| 41 | Italy/Emilia-Romagna | Commercial | Unknown | 2019 |
| 42 | Italy/Emilia-Romagna | Commercial | Unknown | 2019 |
| 43 | Italy/Emilia-Romagna | Commercial | Unknown | 2020 |
| 44 | Italy/Emilia-Romagna | Commercial | Unknown | 2020 |
| 45 | Italy/Emilia-Romagna | Commercial | Unknown | 2020 |
| 46 | Italy/Emilia-Romagna | Commercial | Unknown | 2020 |
| 47 | Italy/Emilia-Romagna | Commercial | Unknown | 2020 |
| 48 | Italy/Emilia-Romagna | Commercial | Unknown | 2020 |
| 49 | Italy/Emilia-Romagna | Commercial | Unknown | 2020 |
| 50 | Italy/Emilia-Romagna | Commercial | Unknown | 2020 |
| 51 | Italy/Emilia-Romagna | Commercial | Unknown | 2020 |
| 52 | Italy/Emilia-Romagna | Commercial | Unknown | 2020 |
| 53 | Italy/Emilia-Romagna | Commercial | Unknown | 2020 |
| 54 | Italy/Emilia-Romagna | Commercial | Unknown | 2020 |
| 55 | Italy/Emilia-Romagna | Commercial | Unknown | 2020 |
| 56 | Italy/Emilia-Romagna | Commercial | Unknown | 2020 |
| 57 | Italy/Emilia-Romagna | Commercial | Unknown | 2020 |
| 58 | Italy/Emilia-Romagna | Commercial | Unknown | 2020 |
| 59 | Italy/Emilia-Romagna | Commercial | Unknown | 2020 |
| 60 | Italy/Emilia-Romagna | Commercial | Unknown | 2020 |
| 61 | Italy/Emilia-Romagna | Commercial | Unknown | 2020 |
| 62 | Italy/Emilia-Romagna | Commercial | Unknown | 2020 |
| 63 | Italy/Emilia-Romagna | Commercial | Unknown | 2020 |
| 64 | Italy/Emilia-Romagna | Commercial | Unknown | 2020 |
| 65 | Italy/Emilia-Romagna | Commercial | Unknown | 2020 |
| 66 | Italy/Emilia-Romagna | Commercial | Unknown | 2020 |
| 67 | Italy/Emilia-Romagna | Commercial | Unknown | 2020 |
| 68 | Italy/Emilia-Romagna | Commercial | Unknown | 2020 |
| 69 | Italy/Emilia-Romagna | Commercial | Unknown | 2020 |
| 70 | Italy/Emilia-Romagna | Commercial | Unknown | 2020 |
| 71 | Italy/Emilia-Romagna | Commercial | Unknown | 2020 |
| 72 | Italy/Emilia-Romagna | Commercial | Unknown | 2020 |
| 73 | Italy/Emilia-Romagna | Commercial | Unknown | 2020 |
| 74 | Italy/Emilia-Romagna | Commercial | Unknown | 2020 |
| 75 | Italy/Emilia-Romagna | Commercial | Unknown | 2020 |
| 76 | Italy/Emilia-Romagna | Commercial | Unknown | 2020 |
| 77 | Italy/Emilia-Romagna | Commercial | Unknown | 2020 |
| 78 | Italy/Emilia-Romagna | Commercial | Unknown | 2020 |
| 79 | Italy/Emilia-Romagna | Commercial | Unknown | 2020 |
| 80 | Italy/Emilia-Romagna | Commercial | Unknown | 2020 |
| 81 | Italy/Emilia-Romagna | Commercial | Unknown | 2020 |
| 82 | Italy/Emilia-Romagna | Commercial | Unknown | 2020 |
| 83 | Italy/Emilia-Romagna | Commercial | Unknown | 2020 |
| 84 | Italy/Emilia-Romagna | Commercial | Unknown | 2020 |
| 85 | Italy/Emilia-Romagna | Commercial | Unknown | 2020 |
| 86 | Italy/Emilia-Romagna | Commercial | Unknown | 2020 |
| 87 | Italy/Emilia-Romagna | Commercial | Unknown | 2020 |
| 88 | Italy/Emilia-Romagna | Commercial | Unknown | 2020 |
| 89 | Italy/Emilia-Romagna | Commercial | Unknown | 2020 |
| 90 | Italy/Emilia-Romagna | Commercial | Unknown | 2020 |
| 91 | Italy/Emilia-Romagna | Commercial | Unknown | 2020 |
| 92 | Italy/Emilia-Romagna | Commercial | *A. m. ligustica* | 2020 |
| 93 | Italy/Emilia-Romagna | Commercial | *A. m. ligustica* | 2020 |
| 94 | Italy/Emilia-Romagna | Commercial | *A. m. ligustica* | 2020 |
| 95 | Italy/Emilia-Romagna | Commercial | *A. m. ligustica* | 2020 |
| 96 | Italy/Emilia-Romagna | Commercial | *A. m. ligustica* | 2020 |
| 97 | Italy/Emilia-Romagna | Commercial | *A. m. ligustica* | 2020 |
| 98 | Italy/Emilia-Romagna | Commercial | *A. m. ligustica* | 2020 |
| 99 | Italy/Emilia-Romagna | Commercial | *A. m. ligustica* | 2020 |
| 100 | Italy/Emilia-Romagna | Commercial | *A. m. ligustica* | 2020 |
| 101 | Italy/Emilia-Romagna | Commercial | *A. m. ligustica* | 2020 |
| 102 | Italy/Emilia-Romagna | Commercial | *A. m. ligustica* | 2020 |
| 103 | Italy/Emilia-Romagna | Commercial | *A. m. ligustica* | 2020 |
| 104 | Italy/Emilia-Romagna | Commercial | *A. m. ligustica* | 2020 |
| 105 | Italy/Emilia-Romagna | Commercial | *A. m. ligustica* | 2020 |
| 106 | Italy/Emilia-Romagna | Commercial | *A. m. ligustica* | 2020 |
| 107 | Italy/Friuli-Venezia Giulia | Commercial | Unknown | 2018 |
| 108 | Italy/Friuli-Venezia Giulia | Commercial | Unknown | 2018 |
| 109 | Italy/Friuli-Venezia Giulia | Commercial | Unknown | 2018 |
| 110 | Italy/Friuli-Venezia Giulia | Commercial | Unknown | 2018 |
| 111 | Italy/Friuli-Venezia Giulia | Commercial | Unknown | 2018 |
| 112 | Italy/Friuli-Venezia Giulia | Commercial | Unknown | 2018 |
| 113 | Italy/Friuli-Venezia Giulia | Commercial | Unknown | 2018 |
| 114 | Italy/Friuli-Venezia Giulia | Commercial | Unknown | 2018 |
| 115 | Italy/Friuli-Venezia Giulia | Commercial | Unknown | 2018 |
| 116 | Italy/Friuli-Venezia Giulia | Commercial | Unknown | 2018 |
| 117 | Italy/Friuli-Venezia Giulia | Commercial | Unknown | 2018 |
| 118 | Italy/Friuli-Venezia Giulia | Commercial | Unknown | 2018 |
| 119 | Italy/Friuli-Venezia Giulia | Commercial | Unknown | 2018 |
| 120 | Italy/Friuli-Venezia Giulia | Commercial | Unknown | 2018 |
| 121 | Italy/Friuli-Venezia Giulia | Commercial | Unknown | 2018 |
| 122 | Italy/Friuli-Venezia Giulia | Commercial | Unknown | 2018 |
| 123 | Italy/Friuli-Venezia Giulia | Commercial | Unknown | 2018 |
| 124 | Italy/Veneto | Commercial | Unknown | 2018 |
| 125 | Italy/Veneto | Commercial | Unknown | 2018 |
| 126 | Italy/Veneto | Commercial | Unknown | 2018 |
| 127 | Italy/Veneto | Commercial | Unknown | 2018 |
| 128 | Italy/Veneto | Commercial | Unknown | 2018 |
| 129 | Italy/Veneto | Commercial | Unknown | 2018 |
| 130 | Italy/Veneto | Commercial | Unknown | 2018 |
| 131 | Italy/Veneto | Commercial | Unknown | 2018 |
| 132 | Italy/Veneto | Commercial | Unknown | 2018 |
| 133 | Italy/Veneto | Commercial | Unknown | 2018 |
| 134 | Italy/Veneto | Commercial | Unknown | 2018 |
| 135 | Italy/Veneto | Commercial | Unknown | 2018 |
| 136 | Italy/Veneto | Commercial | Unknown | 2018 |
| 137 | Italy/Veneto | Commercial | Unknown | 2018 |
| 138 | Italy/Veneto | Commercial | Unknown | 2018 |
| 139 | Italy/Veneto | Commercial | Unknown | 2018 |
| 140 | Italy/Veneto | Commercial | Unknown | 2018 |
| 141 | Italy/Veneto | Commercial | Unknown | 2018 |
| 142 | Italy/Veneto | Commercial | Unknown | 2018 |
| 143 | Italy/Veneto | Commercial | Unknown | 2018 |
| 144 | Italy/Veneto | Commercial | Unknown | 2018 |
| 145 | Italy/Veneto | Commercial | Unknown | 2018 |
| 146 | Italy/Veneto | Commercial | Unknown | 2018 |
| 147 | Italy/Veneto | Commercial | Unknown | 2018 |
| 148 | Italy/Veneto | Commercial | Unknown | 2018 |
| 149 | Italy/Trentino-Alto Adige | Commercial | Unknown | 2018 |
| 150 | Italy/Trentino-Alto Adige | Commercial | Unknown | 2018 |
| 152 | Italy/Trentino-Alto Adige | Commercial | Unknown | 2018 |
| 153 | Italy/Trentino-Alto Adige | Commercial | Unknown | 2018 |
| 154 | Italy/Trentino-Alto Adige | Commercial | Unknown | 2018 |
| 155 | Italy/Trentino-Alto Adige | Commercial | Unknown | 2018 |
| 156 | Italy/Trentino-Alto Adige | Commercial | Unknown | 2018 |
| 157 | Italy/Trentino-Alto Adige | Commercial | Unknown | 2018 |
| 158 | Slovenia | Commercial | *A. m. carnica* | 2017 |
| 159 | Slovenia | Commercial | *A. m. carnica* | 2017 |
| 160 | Slovenia | Commercial | *A. m. carnica* | 2020 |
| 161 | Slovenia | Commercial | *A. m. carnica* | 2020 |
| 162 | Slovenia | Commercial | *A. m. carnica* | 2020 |
| 163 | Slovenia | Commercial | *A. m. carnica* | 2020 |
| 164 | Slovenia | Commercial | *A. m. carnica* | 2020 |
| 165 | Slovenia | Commercial | *A. m. carnica* | 2020 |
| 166 | Slovenia | Commercial | *A. m. carnica* | 2020 |
| 167 | Slovenia | Commercial | *A. m. carnica* | 2020 |
| 168 | Slovenia | Commercial | *A. m. carnica* | 2020 |
| 169 | Slovenia | Commercial | *A. m. carnica* | 2020 |
| 170 | Slovenia | Commercial | *A. m. carnica* | 2020 |
| 171 | Slovenia | Commercial | *A. m. carnica* | 2020 |
| 172 | Slovenia | Commercial | *A. m. carnica* | 2020 |
| 173 | Slovenia | Commercial | *A. m. carnica* | 2020 |
| 174 | Slovenia | Commercial | *A. m. carnica* | 2020 |
| 175 | Slovenia | Commercial | *A. m. carnica* | 2020 |
| 176 | Slovenia | Commercial | *A. m. carnica* | 2020 |
| 177 | Slovenia | Commercial | *A. m. carnica* | 2020 |
| 178 | Slovenia | Commercial | *A. m. carnica* | 2020 |
| 179 | Slovenia | Commercial | *A. m. carnica* | 2020 |
| 180 | Slovenia | Commercial | *A. m. carnica* | 2020 |
| 181 | Slovenia | Commercial | *A. m. carnica* | 2020 |
| 182 | Slovenia | Commercial | *A. m. carnica* | 2020 |
| 183 | Slovenia | Commercial | *A. m. carnica* | 2020 |
| 184 | Slovenia | Commercial | *A. m. carnica* | 2020 |
| 185 | Slovenia | Commercial | *A. m. carnica* | 2020 |
| 186 | Slovenia | Commercial | *A. m. carnica* | 2020 |
| 187 | Slovenia | Commercial | *A. m. carnica* | 2020 |
| 188 | Slovenia | Commercial | *A. m. carnica* | 2020 |
| 189 | Slovenia | Commercial | *A. m. carnica* | 2020 |
| 190 | Slovenia | Commercial | *A. m. carnica* | 2020 |
| 191 | Slovenia | Commercial | *A. m. carnica* | 2020 |
| 192 | Slovenia | Commercial | *A. m. carnica* | 2020 |
| 193 | Slovenia | Commercial | *A. m. carnica* | 2020 |
| 194 | Slovenia | Commercial | *A. m. carnica* | 2020 |
| 195 | Slovenia | Commercial | *A. m. carnica* | 2020 |
| 196 | Croatia | Commercial | *A. m. carnica* | 2017 |
| 197 | Croatia | Commercial | *A. m. carnica* | 2020 |
| 198 | Croatia | Commercial | *A. m. carnica* | 2020 |
| 199 | Croatia | Commercial | *A. m. carnica* | 2020 |
| 200 | Croatia | Commercial | *A. m. carnica* | 2020 |
| 201 | Croatia | Commercial | *A. m. carnica* | 2020 |
| 202 | Croatia | Commercial | *A. m. carnica* | 2020 |
| 203 | Croatia | Commercial | *A. m. carnica* | 2020 |
| 204 | Croatia | Commercial | *A. m. carnica* | 2020 |
| 205 | Croatia | Commercial | *A. m. carnica* | 2020 |
| 206 | Croatia | Commercial | *A. m. carnica* | 2020 |
| 207 | Croatia | Commercial | *A. m. carnica* | 2020 |
| 208 | Croatia | Commercial | *A. m. carnica* | 2020 |
| 209 | Croatia | Commercial | *A. m. carnica* | 2020 |
| 210 | Croatia | Commercial | *A. m. carnica* | 2020 |
| 211 | Croatia | Commercial | *A. m. carnica* | 2020 |
| 212 | Croatia | Commercial | *A. m. carnica* | 2020 |
| 213 | Croatia | Commercial | *A. m. carnica* | 2020 |
| 214 | Croatia | Commercial | *A. m. carnica* | 2020 |
| 215 | Croatia | Commercial | *A. m. carnica* | 2020 |
| 216 | Croatia | Commercial | *A. m. carnica* | 2020 |
| 217 | Croatia | Commercial | *A. m. carnica* | 2020 |
| 218 | Serbia | Commercial | *A. m. carnica* | 2017 |
| 219 | Serbia | Commercial | *A. m. carnica* | 2017 |
| 220 | Serbia | Commercial | *A. m. carnica* | 2018 |
| 221 | Serbia | Commercial | *A. m. carnica* | 2020 |
| 222 | Serbia | Commercial | *A. m. carnica* | 2020 |
| 223 | Serbia | Commercial | *A. m. carnica* | 2020 |
| 224 | Serbia | Commercial | *A. m. carnica* | 2020 |
| 225 | Serbia | Commercial | *A. m. carnica* | 2020 |
| 226 | Serbia | Commercial | *A. m. carnica* | 2020 |
| 227 | Serbia | Commercial | *A. m. carnica* | 2020 |
| 228 | Serbia | Commercial | *A. m. carnica* | 2020 |
| 229 | Serbia | Commercial | *A. m. carnica* | 2020 |
| 230 | Serbia | Commercial | *A. m. carnica* | 2020 |
| 231 | Serbia | Commercial | *A. m. carnica* | 2020 |
| 232 | Serbia | Commercial | *A. m. carnica* | 2020 |
| 233 | Serbia | Commercial | *A. m. carnica* | 2020 |
| 234 | Serbia | Commercial | *A. m. carnica* | 2020 |
| 235 | Serbia | Commercial | *A. m. carnica* | 2020 |
| 236 | Serbia | Commercial | *A. m. carnica* | 2020 |
| 237 | Serbia | Commercial | *A. m. carnica* | 2020 |
| 238 | Serbia | Commercial | *A. m. carnica* | 2020 |
| 239 | Serbia | Commercial | *A. m. carnica* | 2020 |
| 240 | Serbia | Commercial | *A. m. carnica* | 2020 |
| 241 | Italy/Emilia-Romagna | Honeycomb | *A. m. ligustica* | 2020 |
| 242 | Italy/Emilia-Romagna | Honeycomb | *A. m. ligustica* | 2020 |
| 243 | Italy/Emilia-Romagna | Honeycomb | *A. m. ligustica* | 2020 |
| 244 | Italy/Emilia-Romagna | Honeycomb | *A. m. ligustica* | 2020 |
| 245 | Italy/Emilia-Romagna | Honeycomb | *A. m. ligustica* | 2020 |
| 246 | Italy/Emilia-Romagna | Honeycomb | *A. m. ligustica* | 2020 |
| 247 | Italy/Emilia-Romagna | Honeycomb | *A. m. ligustica* | 2020 |
| 248 | Italy/Emilia-Romagna | Honeycomb | *A. m. ligustica* | 2020 |
| 249 | Italy/Emilia-Romagna | Honeycomb | *A. m. ligustica* | 2020 |
| 250 | Italy/Emilia-Romagna | Honeycomb | *A. m. ligustica* | 2020 |
| 251 | Italy/Emilia-Romagna | Honeycomb | *A. m. ligustica* | 2020 |
| 252 | Italy/Emilia-Romagna | Honeycomb | *A. m. ligustica* | 2020 |
| 253 | Italy/Emilia-Romagna | Honeycomb | *A. m. ligustica* | 2020 |
| 254 | Italy/Emilia-Romagna | Honeycomb | *A. m. ligustica* | 2020 |
| 255 | Italy/Emilia-Romagna | Honeycomb | *A. m. ligustica* | 2020 |
| 256 | Mixed 50% C1-50% C2 | Commercial | *A. m. ligustica + A. m. carnica* | 2020 |
| 257 | Mixed 80% C1-20% C2 | Commercial | *A. m. ligustica + A. m. carnica* | 2020 |
| 258 | Mixed 20% C1-80% C2 | Commercial | *A. m. ligustica + A. m. carnica* | 2020 |

**Figure S1.** Alignment of the sequences of the C1 and C2 mitotypes of *Apis mellifera* retrieved from GenBank/EMBL with a clear haplotype annotation (75 sequences). The first sequence reports the region of the amplified C1 mitotype that we obtained from honey bees of the *A. m. ligustica* raised in Emilia-Romagna region (Italy). Dots indicate the same aligned nucleotide in that position. "-": indicates a gap introduced in the alignment. The accession number of the aligned sequences is reported with a number indicating the starting aligned nucleotide. The first and the last ends correspond to the primer regions (evidenced in bold and in blue) and to the positions 3363 and 3532 respectively on the mitochondrial reference genome NC_001566.1. All the C1 sequences carry four “C” in the position highlighted in red and with an arrow whereas all C2 sequences carry three “C” at this site.


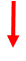


Em_Rom 1 **GGCAGAATAAGTGCATTG**AACTTAAGATTCAAATATAAAGTATTTTTAAACTTTTATTAAAATTTCCCCACTTAATTCATATTAATTTAAAAATAAATTAATAACAATTTTTAATAAAATAAATAATTAATTTTATTTTTATATT**GAATT** 150

JQ977699.1 1 ...................................................................................................................................................... 150

EF033655.1 1 ...................................................................................................................................................... 150

MK393128.1 1 .................................................................................................-.................................................... 149

MH939353.1 1 ....................................................................-................................................................................. 149

MH939350.1 1 ....................................................................-................................................................................. 149

MH939349.1 1 ....................................................................-................................................................................. 149

MH939348.1 1 ....................................................................-................................................................................. 149

MH939346.1 1 ....................................................................-................................................................................. 149

MH939345.1 1 ....................................................................-................................................................................. 149

MH939339.1 1 ....................................................................-................................................................................. 149

MH939337.1 1 ....................................................................-................................................................................. 149

MH939336.1 1 ....................................................................-................................................................................. 149

MH939335.1 1 ....................................................................-................................................................................. 149

MH939333.1 1 ....................................................................-................................................................................. 149

MH939332.1 1 ....................................................................-................................................................................. 149

MT741506.1 1 ....................................................................-................................................................................. 149

MT741505.1 1 ....................................................................-................................................................................. 149

MT741504.1 1 ....................................................................-................................................................................. 149

MT741503.1 1 ....................................................................-................................................................................. 149

MT741502.1 1 ....................................................................-................................................................................. 149

MT741501.1 1 ....................................................................-................................................................................. 149

MT741500.1 1 ....................................................................-................................................................................. 149

MT741499.1 1 ....................................................................-................................................................................. 149

MT741498.1 1 ....................................................................-................................................................................. 149

JQ973664.1 1 ....................................................................-................................................................................. 149

JQ973663.1 1 ....................................................................-................................................................................. 149

JQ977703.1 1 ....................................................................-................................................................................. 149

JQ754650.1 1 ....................................................................-................................................................................. 149

JQ754649.1 1 ....................................................................-................................................................................. 149

JQ754648.1 1 ....................................................................-................................................................................. 149

JQ582431.1 157 ....................................................................-................................................................................. 305

JF723978.1 1 ....................................................................-................................................................................. 149

JF723977.1 1 ....................................................................-................................................................................. 149

JF723976.1 1 ....................................................................-................................................................................. 149

HQ199228.1 1 ....................................................................-................................................................................. 149

HQ199227.1 1 ....................................................................-................................................................................. 149

MH939352.1 1 ....................................................................-................................................................................. 149

MH939347.1 1 ..............................................................C.....-................................................................................. 149

MH939344.1 1 ...............................................T....................-................................................................................. 149

MH939343.1 1 ...............................................T....................-................................................................................. 149

MH939340.1 1 ...............................................T....................-................................................................................. 149

MH939338.1 1 ....................................................................-................................................................................C 149

MH939334.1 1 ....................................................................-................................................................................. 149

JF723979.1 1 ....................................................................-................................................................................. 149

MH939351.1 1 ....................................................................-.......................................................-......................... 148

JQ977702.1 1 ....................................................................-......................................-.......................................... 148

MH939342.1 1 ...............................................T....................-................................................................................. 149

MF428426.1 1 ............................................................................................................................................ 140

MH939341.1 1 ...............................................T.............T..-...-................................................................................. 148

JQ977705.1 1 ....................................................................-.................C....................-.......................................... 148

JQ977704.1 1 ....................................................................-......................................-.......................................... 148

KF955992.1 1 .......................................................................................................................................... 138

GQ433627.1 1 ...........................................................-................................................................................. 140

GQ433625.1 1 ...........................................................-................................................................................. 140

KX463941.1 1 ..........................................................-................................................................................. 139

KF955993.1 1 ...............................................................................................................C.......................... 138

GQ433626.1 1 ..................................C........................-................................................................................. 140

KF955994.1 1 ........................................................-................................................................................. 137

HM117906.1 1 ........................................................-................................................................................. 137

HM117905.1 1 ........................................................-................................................................................. 137

KT828493.1 1 .................................................................................................................................... 132

GQ433624.1 1 ...........................................................-..........................................-...................................... 139

GQ433623.1 1 ...........................................................-..........................................-...................................... 139

HM117904.1 1 .......................................................-................................................................................. 136

KT828494.1 1 .........................................................................................................C.......................... 132

KT828499.1 1 ..................................................-................................................................................. 131

KT828498.1 1 ..................................................-................................................................................. 131

KT828496.1 1 ..................................................-................................................................................. 131

KT828495.1 1 ..................................................-................................................................................. 131

FJ357808.1 1 ..................................................-................................................................................. 131

FJ357805.1 1 ..................................................-...................................A............................................. 131

MF428427.1 1 ...................................................-..........................................-...................................... 131

KT828497.1 1 ..................................................-..........................................-...................................... 130

FJ357807.1 1 ..................................................-..........-...................................................................... 130

FJ357806.1 1 ..................................................-..........-...................................................................... 130

Em_Rom 151 **TTAAATTCAATCTTAAAGAT** 170

JQ977699.1 151 .................... 170

EF033655.1 151 .................... 170

MK393128.1 150 .................... 169

MH939353.1 150 .................... 169

MH939350.1 150 .................... 169

MH939349.1 150 .................... 169

MH939348.1 150 .................... 169

MH939346.1 150 .................... 169

MH939345.1 150 .................... 169

MH939339.1 150 .................... 169

MH939337.1 150 .................... 169

MH939336.1 150 .................... 169

MH939335.1 150 .................... 169

MH939333.1 150 .................... 169

MH939332.1 150 .................... 169

MT741506.1 150 .................... 169

MT741505.1 150 .................... 169

MT741504.1 150 .................... 169

MT741503.1 150 .................... 169

MT741502.1 150 .................... 169

MT741501.1 150 .................... 169

MT741500.1 150 .................... 169

MT741499.1 150 .................... 169

MT741498.1 150 .................... 169

JQ973664.1 150 .................... 169

JQ973663.1 150 .................... 169

JQ977703.1 150 .................... 169

JQ754650.1 150 .................... 169

JQ754649.1 150 .................... 169

JQ754648.1 150 .................... 169

JQ582431.1 306 .................... 325

JF723978.1 150 .................... 169

JF723977.1 150 .................... 169

JF723976.1 150 .................... 169

HQ199228.1 150 .................... 169

HQ199227.1 150 .................... 169

MH939352.1 150 .A.................. 169

MH939347.1 150 .................... 169

MH939344.1 150 .................... 169

MH939343.1 150 .................... 169

MH939340.1 150 .................... 169

MH939338.1 150 .................... 169

MH939334.1 150 .A.................. 169

JF723979.1 150 .A.................. 169

MH939351.1 149 .................... 168

JQ977702.1 149 .................... 168

MH939342.1 150 .A.................. 169

MF428426.1 141 .................... 160

MH939341.1 149 .................... 168

JQ977705.1 149 .................... 168

JQ977704.1 149 .A.................. 168

KF955992.1 139 .................... 158

GQ433627.1 141 .................... 160

GQ433625.1 141 .................... 160

KX463941.1 140 .................... 159

KF955993.1 139 .................... 158

GQ433626.1 141 .................... 160

KF955994.1 138 .................... 157

HM117906.1 138 .................... 157

HM117905.1 138 .................... 157

KT828493.1 133 .................... 152

GQ433624.1 140 .................... 159

GQ433623.1 140 .................... 159

HM117904.1 137 .A.................. 156

KT828494.1 133 .................... 152

KT828499.1 132 .................... 151

KT828498.1 132 .................... 151

KT828496.1 132 .................... 151

KT828495.1 132 .................... 151

FJ357808.1 132 .................... 151

FJ357805.1 132 .................... 151

MF428427.1 132 .................... 151

KT828497.1 131 .................... 150

FJ357807.1 131 .................... 150

FJ357806.1 131 .................... 150

**Figure S2.** Gel electrophoresis separation of the amplified fragments obtained with the method of Utzeri et al. (2018a). Lanes 1-3: honey samples. Lane L: DNA ladder. The fragments of the three main mitochondrial lineages are indicated.

**Figure S3.** Map of Italy with indicated the regions where the analysed honey samples were produced.
